# Supplementary material for: Expression of the RAE-1 Family of Stimulatory NK-Cell Ligands Requires Activation of the PI3K Pathway during Viral Infection and Transformation
Source: PubMed Central journal article supplement (PMC3178570; doi:10.1371/journal.ppat.1002265), 2011-09-22

Supplementary Figure 4

**A**

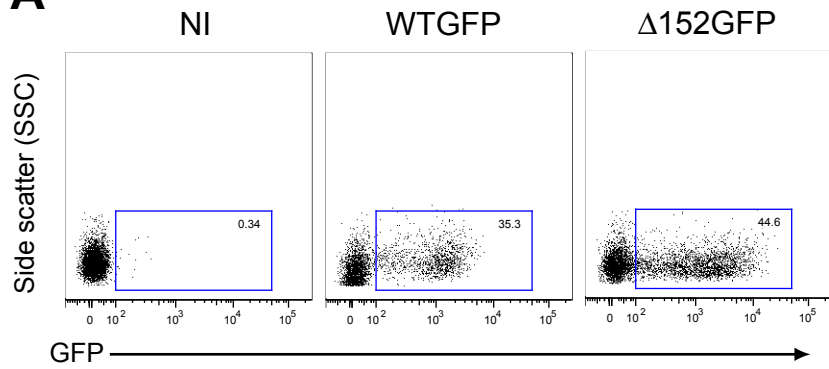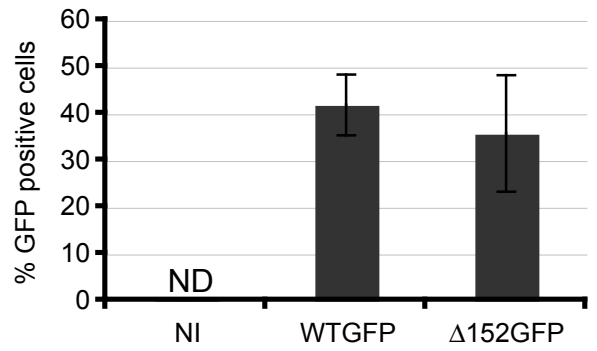

**B**

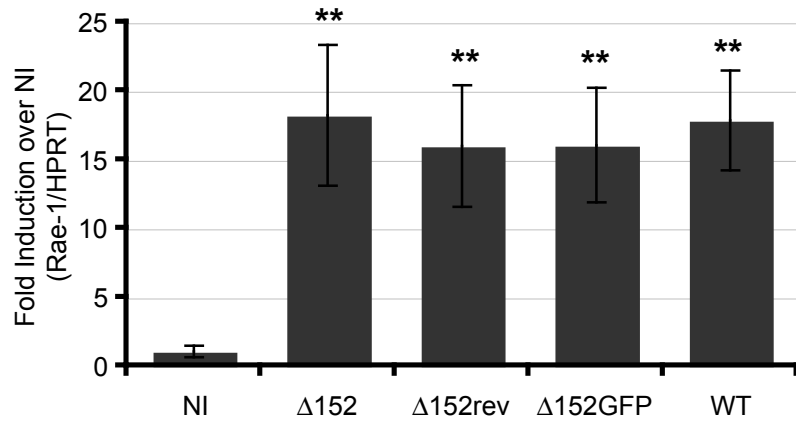

**C**

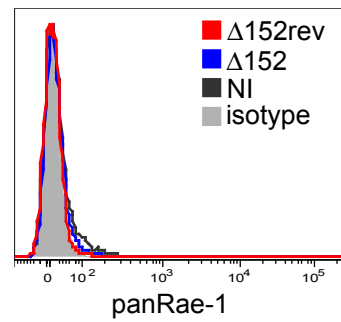

**D**

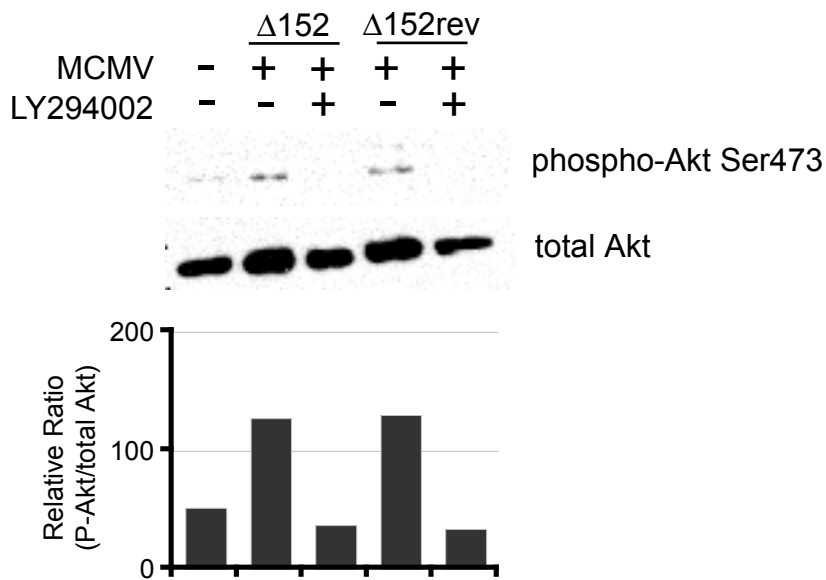

Supplement: ppat.1002265.s004.pdf [file ppat.1002265.s004.pdf]
